# Supplementary material
Source: Springer Nature journal article supplement (https://www.springermedizin.de/resource/supplementary/12889_2008_1205_MOESM1_ESM.pdf/9502686)
Supplement: MOESM1 [file 9502686]

| Organisational levels (Maintaining Change Themes) | Burdens | Environment |               | Facilities                      | Locality                      | Weather                   | Season                       | Cost                   |                  |                       |                                     |                       |
|---------------------------------------------------|---------|-------------|---------------|---------------------------------|-------------------------------|---------------------------|------------------------------|------------------------|------------------|-----------------------|-------------------------------------|-----------------------|
|                                                   |         | Social      |               | Demands                         | Relationships                 | Unhelpful advice          | Time demands                 | The wrong time         | Occasions        |                       |                                     |                       |
|                                                   |         | individual  | Physical      | Pre existing physical condition | Physical setback              | Medication issues         |                              |                        |                  |                       |                                     |                       |
|                                                   |         |             | Psychological | Temptation                      | Confusion                     | Resignation               | Too much effort              | Lack of ability        | Injustice        |                       |                                     |                       |
|                                                   |         |             |               |                                 |                               |                           |                              |                        |                  |                       |                                     |                       |
|                                                   | Props   | individual  | Psychological | Temptation avoidance            | Stimulus control Substitution | Qualifying burdens        | Self talk Encourage          | Reward Feeling pleased | Diagnosis impact | Targets Goals Routine | Monitoring self Identifying success | Permission Allowances |
|                                                   |         |             | Physical      | Becoming fitter                 | Appropriate medication        | Biological feedback       | Improving physical condition |                        |                  |                       |                                     |                       |
|                                                   |         | Social      |               | Helpful relation-ships          | Social Involvement            | Motivational interviewing | Monitoring professional      | Having time            | Timeliness       | Influence             |                                     |                       |
|                                                   |         | Environment |               | Locality                        | Facilities                    | Weather                   | Season                       | Cost                   |                  |                       |                                     |                       |
